# Supplementary material
Source: PubMed Central journal article supplement (PMC8077751)

# CTLA-4 SPADE Analysis Trees

Normal Peripheral Blood

Cancer Peripheral Blood

Cancer Patient Spleen

FSC-A

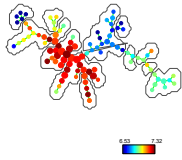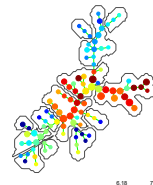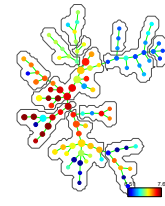

SSC-A

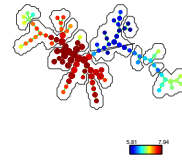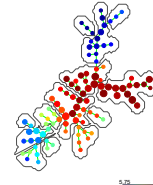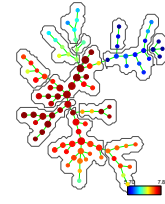

CD14

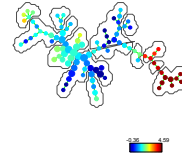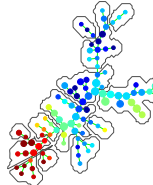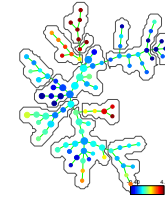

CD15

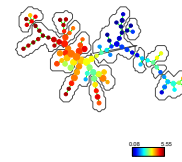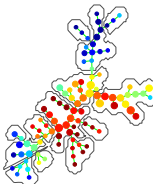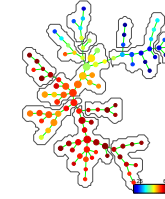

CD33

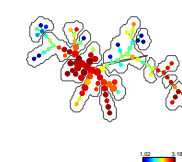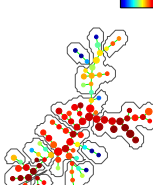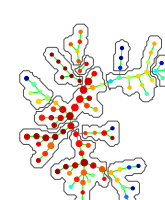

CD34

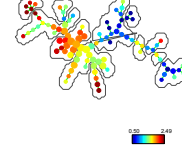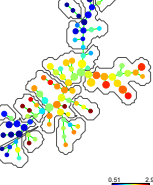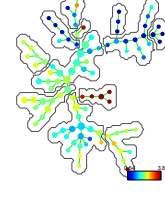

CTLA-4

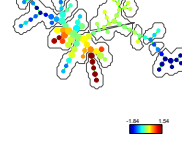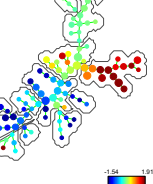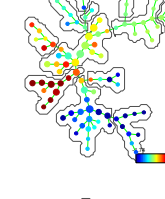

LOX-1

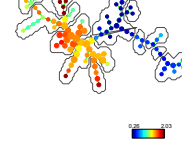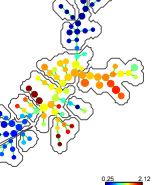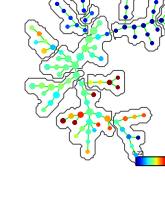

Cell Frequency

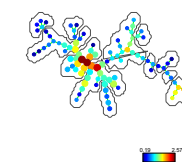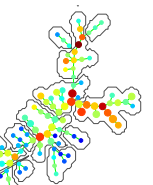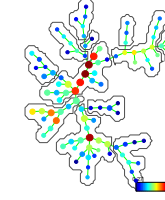

Supplement: NIHMS1683116-supplement-3.pdf [file NIHMS1683116-supplement-3.pdf]
