# Supplementary material
Source: PubMed Central journal article supplement (PMC8077751)

# PD-L1 SPADE Analysis Trees

Normal Peripheral Blood

Cancer Peripheral Blood

Cancer Patient Spleen

FSC-A

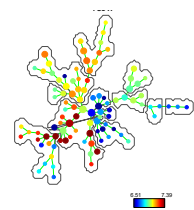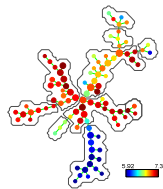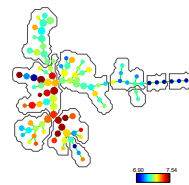

SSC-A

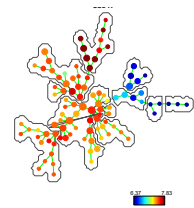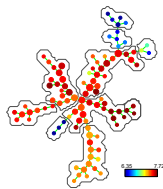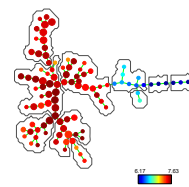

CD14

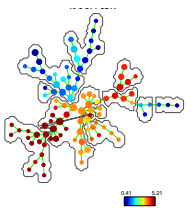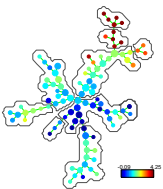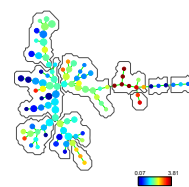

CD15

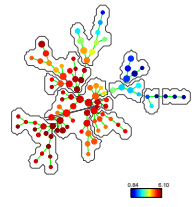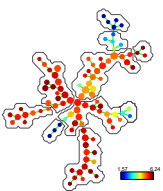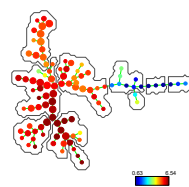

CD33

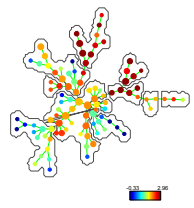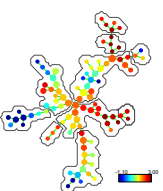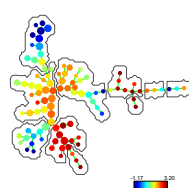

LOX-1

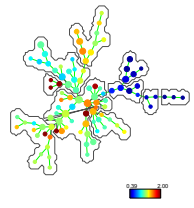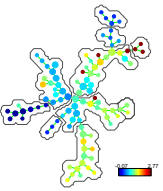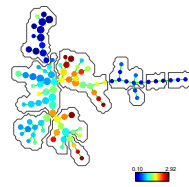

PD-1

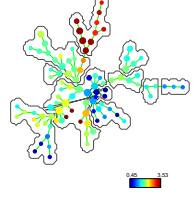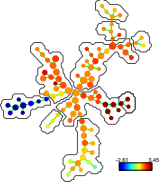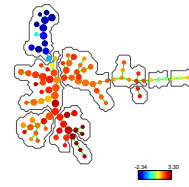

PD-L1

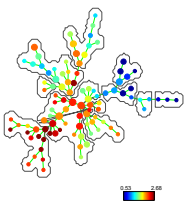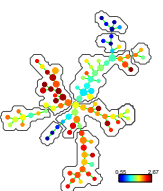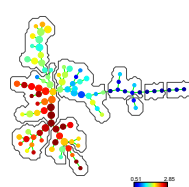

Cell Frequency

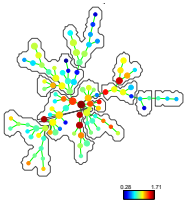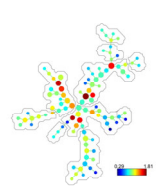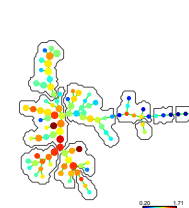

Supplement: NIHMS1683116-supplement-4.pdf [file NIHMS1683116-supplement-4.pdf]
