# Supplementary material
Source: PubMed Central journal article supplement (PMC8077751)

# Enzyme SPADE Analysis Trees

Normal Peripheral Blood

Cancer Peripheral Blood

Cancer Patient Spleen

FSC-A

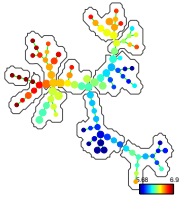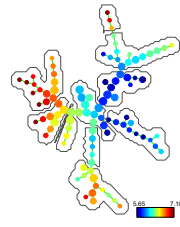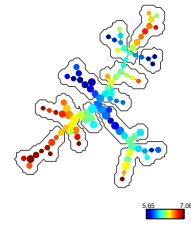

SSC-A

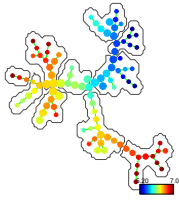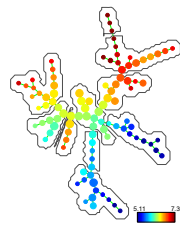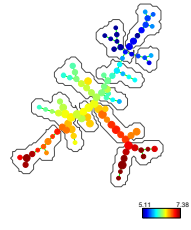

CD14

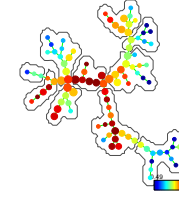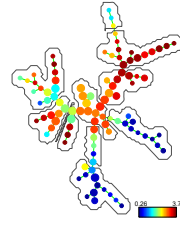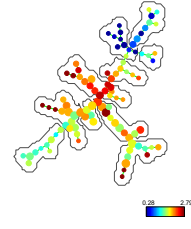

CD15

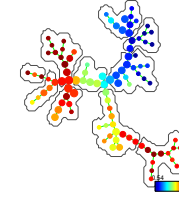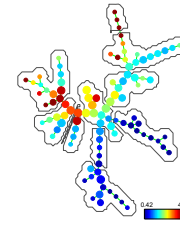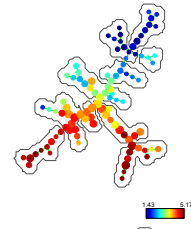

LOX-1

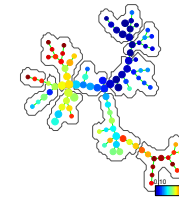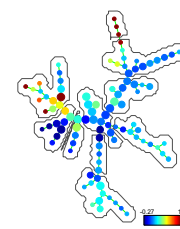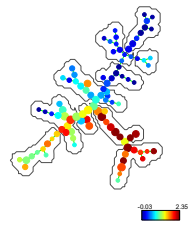

CD33

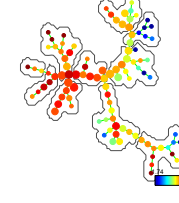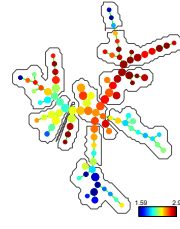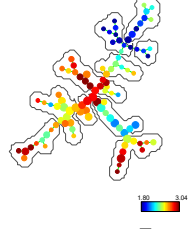

i-NOS

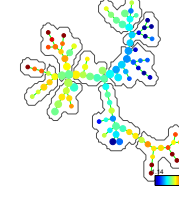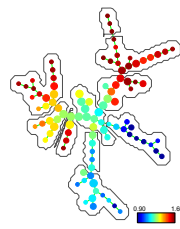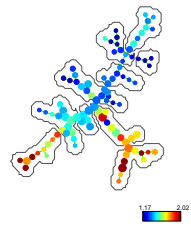

Arginase

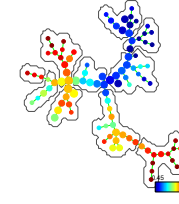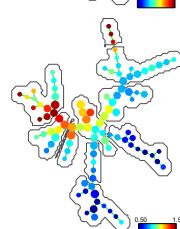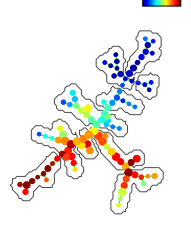

Cell Frequency

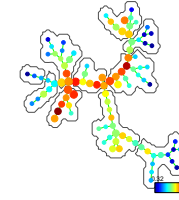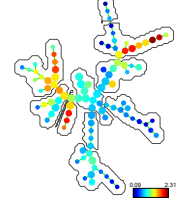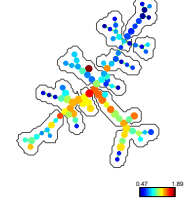

Supplement: NIHMS1683116-supplement-5.pdf [file NIHMS1683116-supplement-5.pdf]
