# Supplementary material
Source: PubMed Central journal article supplement (PMC8077751)

# CTLA-4 & PD-L1 CytoBackBone SPADE Analysis Trees

Normal Peripheral Blood

Cancer Peripheral Blood

Cancer Patient Spleen

CD15

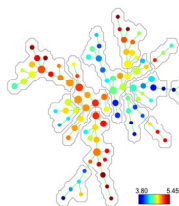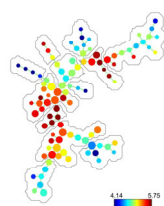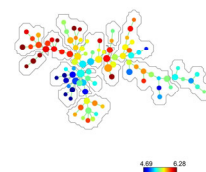

CD14

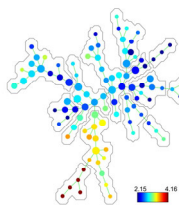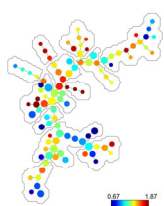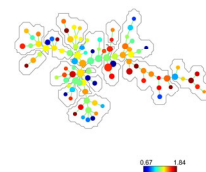

CD33

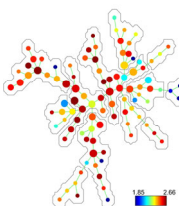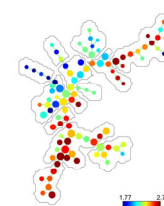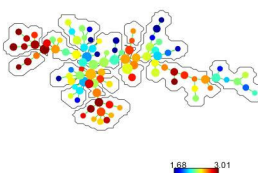

CD34

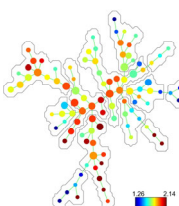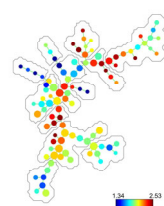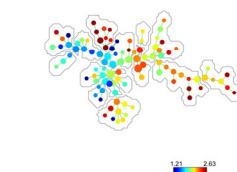

LOX-1

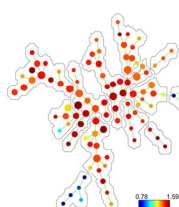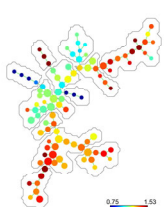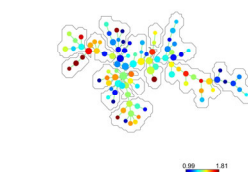

CTLA-4

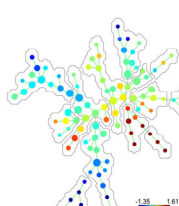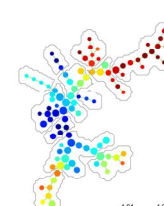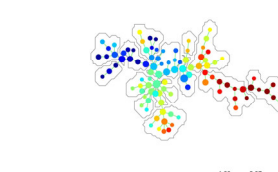

PD-L1

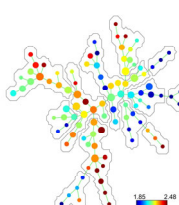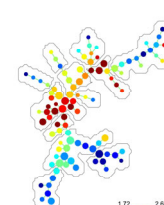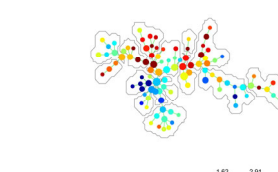

PD-1

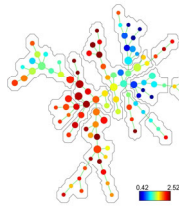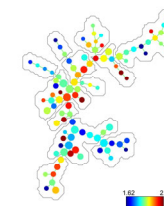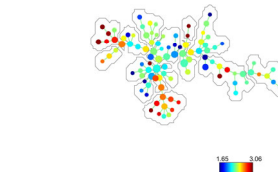

# CTLA-4 SPADE Analysis Trees

Normal Peripheral Blood

Cancer Peripheral Blood

Cancer Patient Spleen

FSC-A

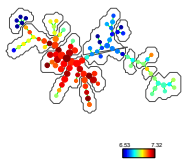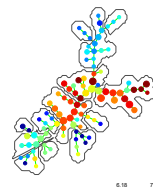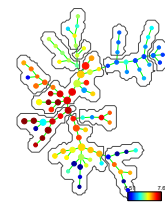

SSC-A

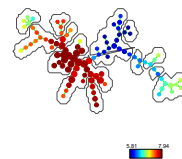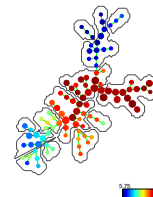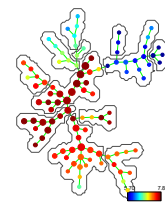

CD14

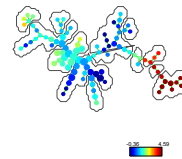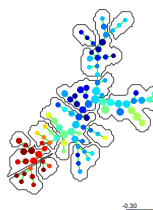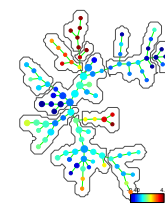

CD15

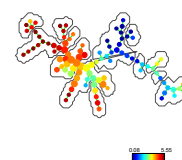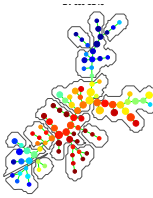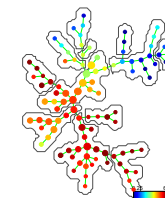

CD33

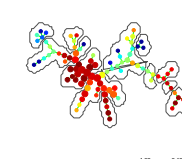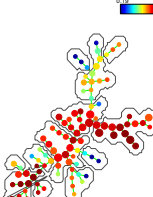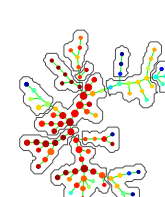

CD34

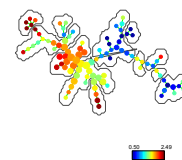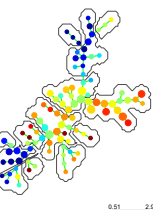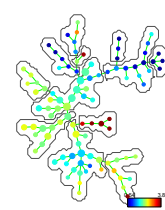

CTLA-4

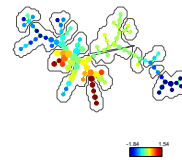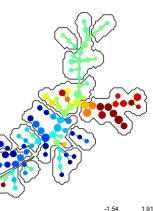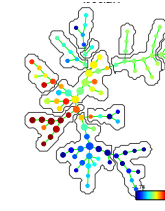

LOX-1

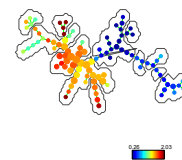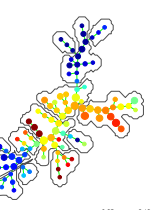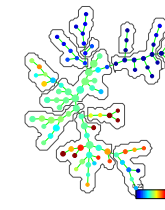

Cell Frequency

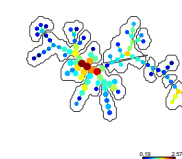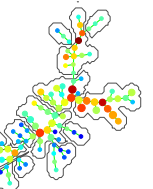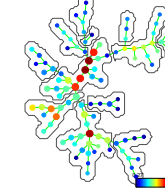

# PD-L1 SPADE Analysis Trees

Normal Peripheral Blood

Cancer Peripheral Blood

Cancer Patient Spleen

FSC-A

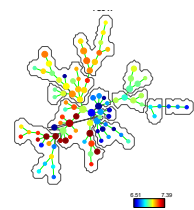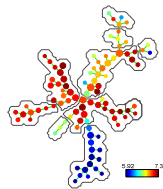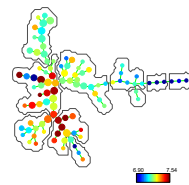

SSC-A

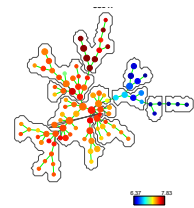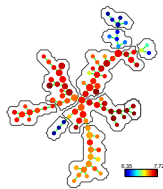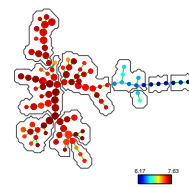

CD14

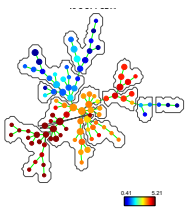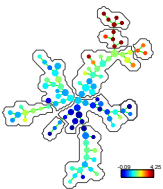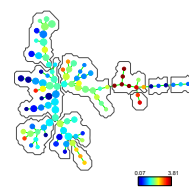

CD15

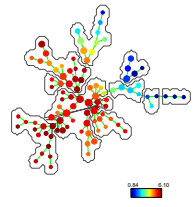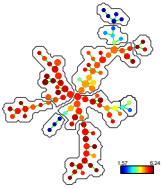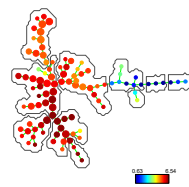

CD33

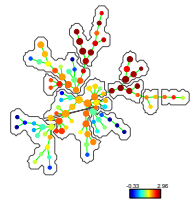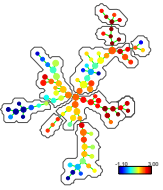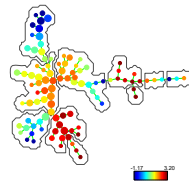

LOX-1

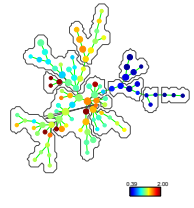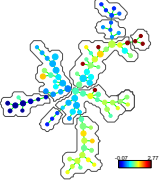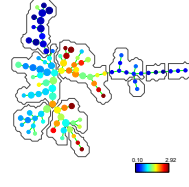

PD-1

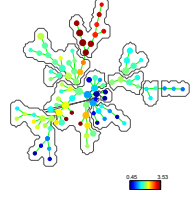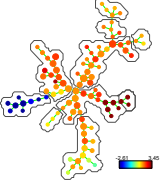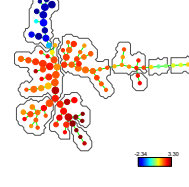

PD-L1

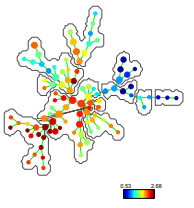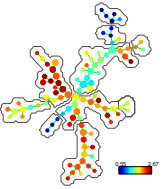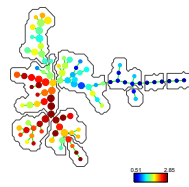

Cell Frequency

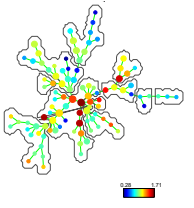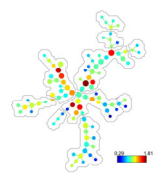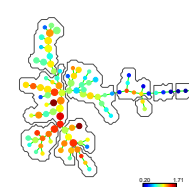

# Enzyme SPADE Analysis Trees

Normal Peripheral Blood

Cancer Peripheral Blood

Cancer Patient Spleen

FSC-A

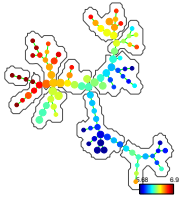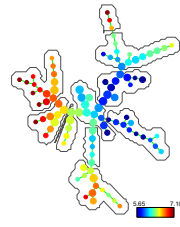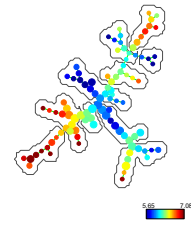

SSC-A

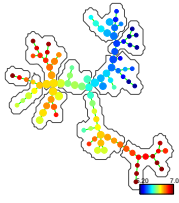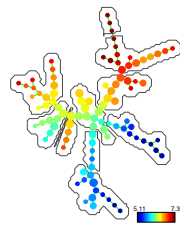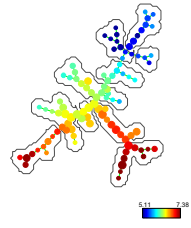

CD14

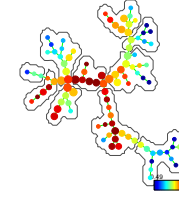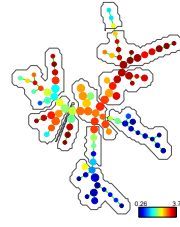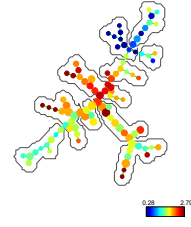

CD15

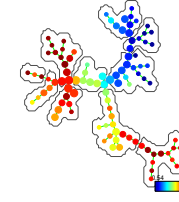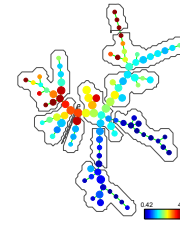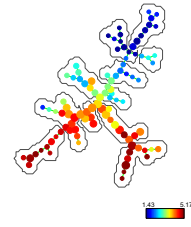

LOX-1

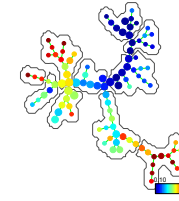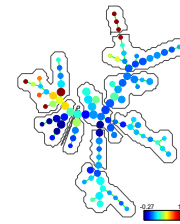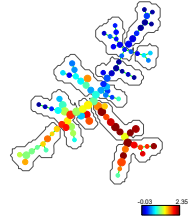

CD33

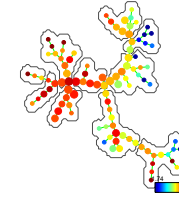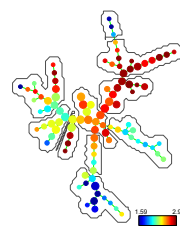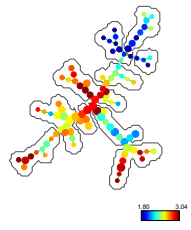

i-NOS

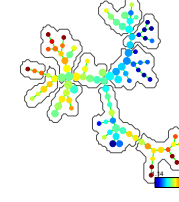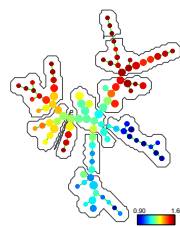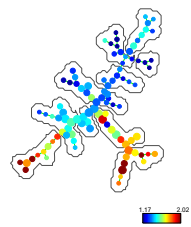

Arginase

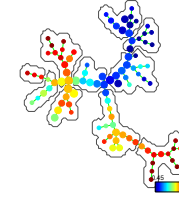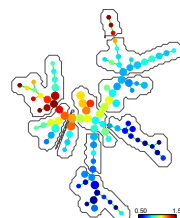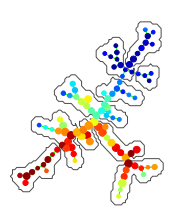

Cell Frequency

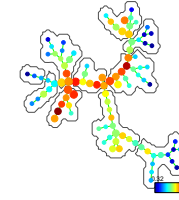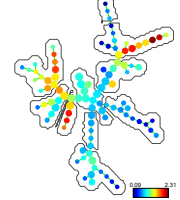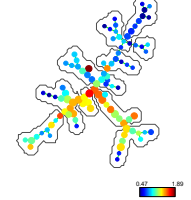

Supplement: NIHMS1683116-supplement-6.pdf [file NIHMS1683116-supplement-6.pdf]
