# Supplementary material
Source: PubMed Central journal article supplement (PMC8077751)

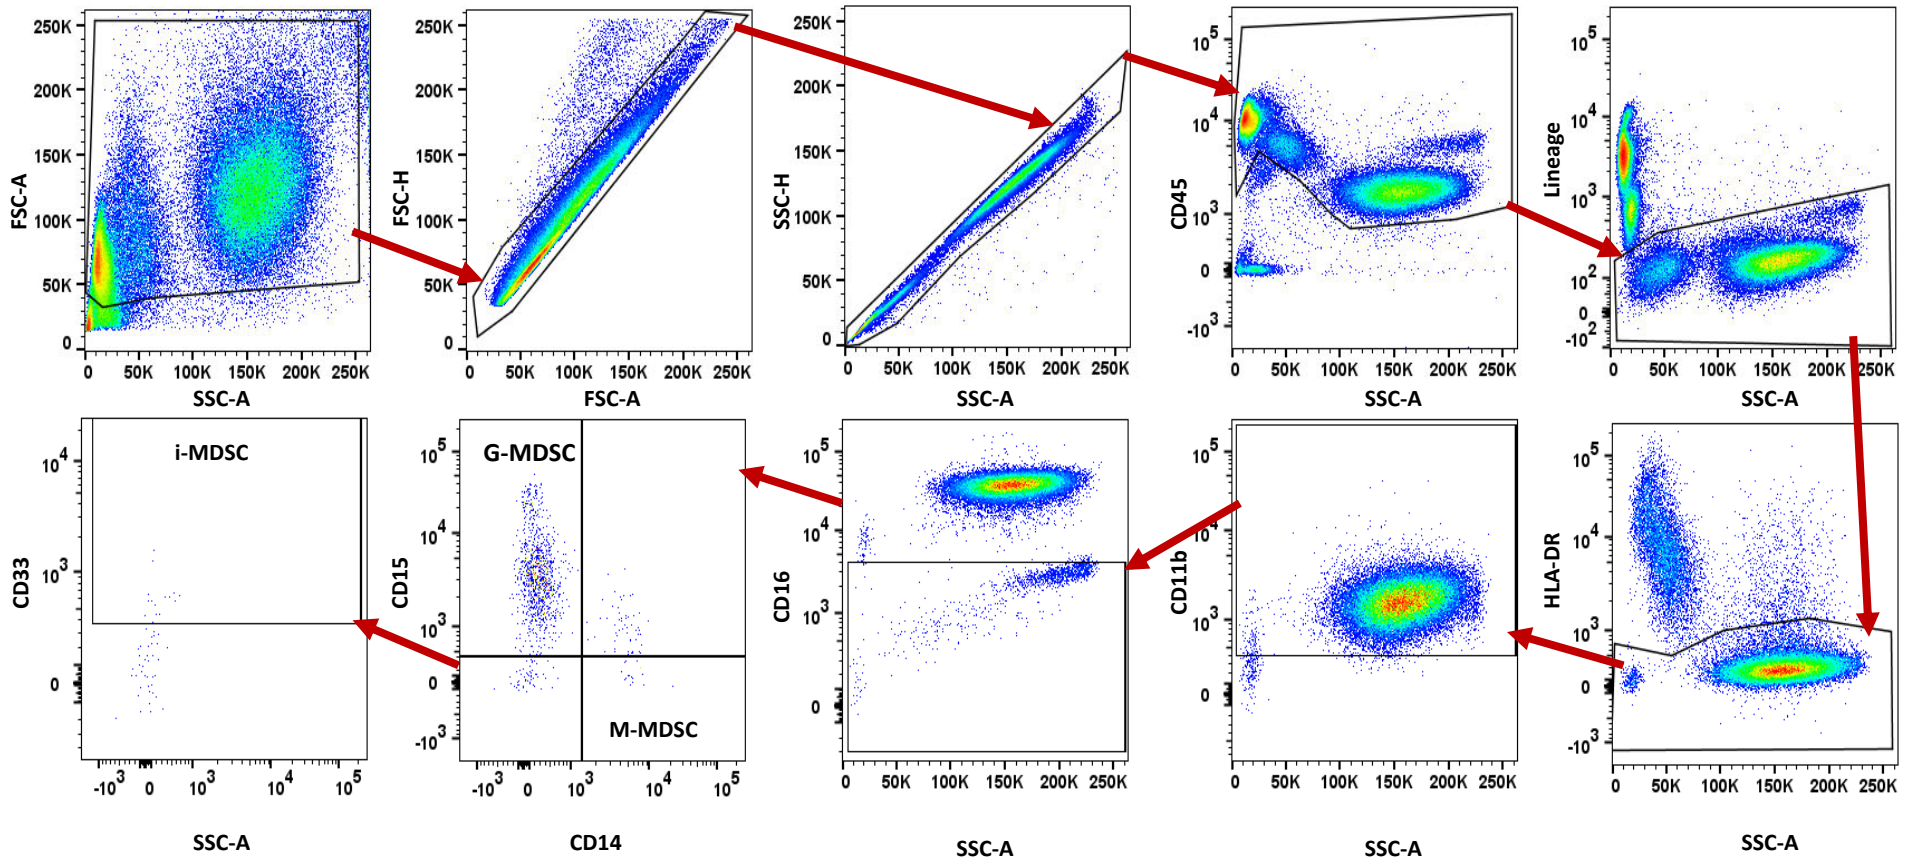

Supplement: NIHMS1683116-supplement-2.pdf [file NIHMS1683116-supplement-2.pdf]
